# Supplementary material for: An unsaturated hydrogen bonded network generated from three-fold symmetric carbamates
Source: Royal Society of Chemistry journal article supplement (doi:10.1039/c4ce00363b), 2014-01-01
Supplement: c4ce00363b1.pdf [file c4ce00363b1.pdf]

# An Unsaturated Hydrogen Bonded Network Generated from Three-fold Symmetric Carbamates

Zijun Wang,<sup>a</sup> Joseph Lee,<sup>a</sup> Casey Oian,<sup>a</sup> Xiaodong Hou,<sup>a</sup> Zhihan Wang,<sup>a</sup> Angel Ugrinov,<sup>b</sup> Rajiv Singh,<sup>a</sup> Erin Wysocki,<sup>a</sup> and Qianli Rick Chu<sup>a\*</sup>

<sup>a</sup> *Department of Chemistry, University of North Dakota, Grand Forks, ND 58202, USA*

<sup>b</sup> *Department of Chemistry and Biochemistry, North Dakota State University, Fargo, ND 58102*

## Table of Contents

|                                                                                                      |    |
|------------------------------------------------------------------------------------------------------|----|
| 1. Materials and Methods .....                                                                       | 2  |
| 1.1. General .....                                                                                   | 2  |
| 1.2. Synthesis.....                                                                                  | 3  |
| 2. Spectra, data and images .....                                                                    | 5  |
| 2.1. Images of <b>C-4</b> and <b>C-6</b> Crystals.....                                               | 5  |
| 2.2. <sup>1</sup> H, <sup>13</sup> C NMR and IR Spectra .....                                        | 6  |
| 2.3. <sup>1</sup> H- NMR Spectra of <b>C-6</b> in CDCl <sub>3</sub> at Different Concentration ..... | 11 |
| 2.4. ORTEP and Hydrogen Bond Table of <b>C-4</b> Crystal Structure .....                             | 12 |
| 2.5. ORTEP and Hydrogen Bond Table of <b>C-6</b> Crystal Structure .....                             | 13 |
| 2.6. Images of <b>C-6</b> Crystal Structure .....                                                    | 14 |
| 2.7. Packing of <b>C-4</b> and <b>C-6</b> sheets in Crystals .....                                   | 15 |

## 1. Materials and Methods

### 1.1. General

All the reagents were purchased from Alfa Aesar, Sigma-Aldrich, and used without further purification. Thin layer chromatography (TLC) was performed on a silica gel W/UV 200  $\mu\text{m}$  pre-coated plates. Nuclear magnetic resonance spectra (NMR) were recorded with Bruker ADVANCE ( $^1\text{H}$ : 500 MHz,  $^{13}\text{C}$ : 125 MHz). All spectra were obtained in deuterium Chloroform (Chloroform-*d*). For Chloroform-*d* solution, the chemical shifts were reported as parts per million (ppm). Coupling constants were reported in Hertz (Hz). Data for  $^1\text{H}$ -NMR spectra were reported as follows: chemical shift (ppm: referenced to protium), brs = broad singlet, s = singlet, d = doublet, t = triplet, q = quartet, dd = doublet of doublets, dt = doublet of triplets, ddd = doublet of doublet of doublets, p = pentet, h = heptet, m = multiplet, coupling constant (Hz), and integration. Single crystal X-ray data were recorded on Bruker Kappa Apex II Duo X-Ray Diffractometer with Mo  $K\alpha$  ( $\lambda = 0.71073 \text{ \AA}$ ) or Cu  $K\alpha$  ( $\lambda = 1.54178 \text{ \AA}$ ). Melting points (m.p.) were measured on a MEL-TEMP device, which was calibrated by using hydroquinone as a standard. The melting points are averages of three measurements. Infrared spectroscopy (IR) was recorded on Thermo Scientific Nicolet iS5 FT-IR spectrometer.

## 1.2. Synthesis

### 1.2.1. Synthesis of benzene-1,3,5-triyl tris(propyl-carbamate), (**C-3**)

Synthesis of **C-3** was reported in a previous published paper (See reference 5).

### 1.2.2. Synthesis of benzene-1,3,5-triyl tris(butyl-carbamate), (**C-4**)

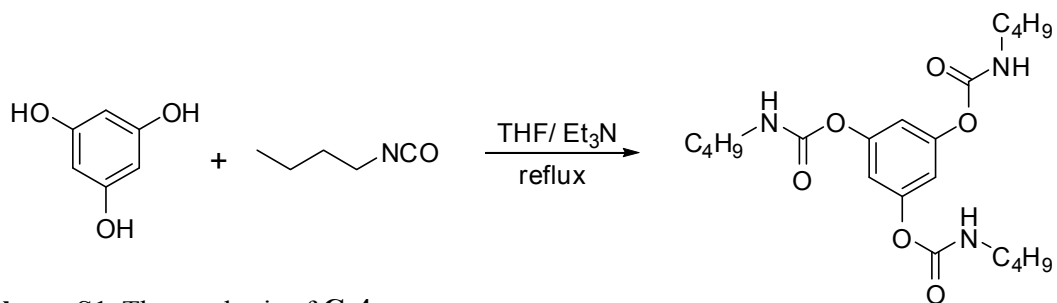

**Scheme S1.** The synthesis of **C-4**.

A flame dried 50 mL round bottom flask equipped with a magnetic stir bar was charged with 1-isocyanatobutane (0.72 g, 6 mmol) and a catalytic amount of triethylamine (4-6 drops) in 10 mL of THF. The mixture was stirred at room temperature for 5 minutes. Phloroglucinol (0.25 g, 2 mmol) in 5 mL of THF was added drop wise for 10 minutes. Then the mixture was refluxed for 16 hours. The mixture was concentrated by evaporating the solvent with a rotavapor and recrystallized in 25 mL of EtOAc. The title **C-4** (m.p. 130 – 132 °C) was obtained as a white solid (0.79 g, 93%). <sup>1</sup>H NMR(CDCl<sub>3</sub>, δ, ppm): 0.95 (t, J = 7.4 Hz, 9H), 1.38 (m, 6H), 1.54 (m, 6H), 3.24 (m, 6H), 5.04 (s, 3H), 6.85 (s, 3H); <sup>13</sup>C NMR (CDCl<sub>3</sub>, δ, ppm): 14.1, 20.2, 32.2, 41.3, 112.2, 151.8, 154.1; IR (Nujol, ν, cm<sup>-1</sup>) 3331, 3289, 2955, 2931, 1744, 1720, 1693, 1529, 1455, 1241, 1137.

1.2.3. Synthesis of benzene-1,3,5-triyl tris(hexyl-carbamate), (**C-6**)

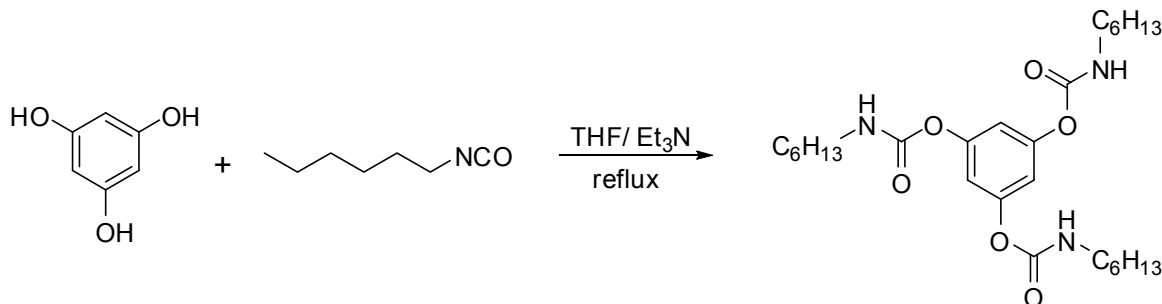

**Scheme S2.** The synthesis of **C-6**.

A flame dried 100 mL round bottom flask equipped with a magnetic star bar was charged with 1-isocyanatohexane (2.26 g, 18 mmol) and a catalytic amount of triethylamine (4-6 drops) in 10 mL of THF. The mixture was stirred at room temperature for 5 minutes. Phloroglucinol (0.75 g, 6 mmol) in 5 mL of THF was added drop wise for 10 minutes. Then the mixture was refluxed for 4 hours. The mixture was concentrated by evaporating the solvent with a rotavapor and precipitated in 250 mL of ice cold water. The solid product was filtered on a Buchner funnel and washed several times with deionized water. The title **C-6** (m.p. 130 – 131 °C) was obtained as a white solid (2.85 g, 93%). <sup>1</sup>H NMR(CDCl<sub>3</sub>, δ, ppm): 0.90 (t, J = 7.0 Hz, 9H), 1.28 – 1.44 (m, 18H), 1.65 (t, J = 7.1, 6H), 3.23 (m, 6H), 5.05 (s, 3H), 6.85 (s, 3H). <sup>13</sup>C NMR (CDCl<sub>3</sub>, δ, ppm): 14.4, 23.0, 26.8, 30.2, 31.8, 41.6, 112.2, 151.8, 154.2. IR (Nujol, ν, cm<sup>-1</sup>) 3332, 3290, 2954, 2927, 1745, 1719, 1693, 1533, 1458, 1240, 1142.

## 2. Spectra, data and images

### 2.1. Images of C-4 and C-6 Crystals

The crystals of **C-4** and **C-6** were obtained by slowly evaporating acetonitrile and acetonitrile/dichloromethane solution of the carbamates, respectively. Single crystal X-ray diffraction data of the compound was collected on a Bruker Apex Duo diffractometer with a Apex 2 CCD area detector at  $T = 100\text{K}$ . Cu radiation was used. All structures were process with Apex 2 v2013.4-1 software package with the most recent SAINT and SHELX software. Intrinsic phasing method was used to solve the structures after multi-scan absorption corrections (SADABS 2012/1). Details of data collection and refinement are given in the Table 1 and CIF files. INS and HKL files for **C-4** and **C-6** are inserted in the CIF. The crystallographic data for the three tri-carbamates are available in Cambridge Crystallographic Data Centre (CCDC# 987316 and 987317).

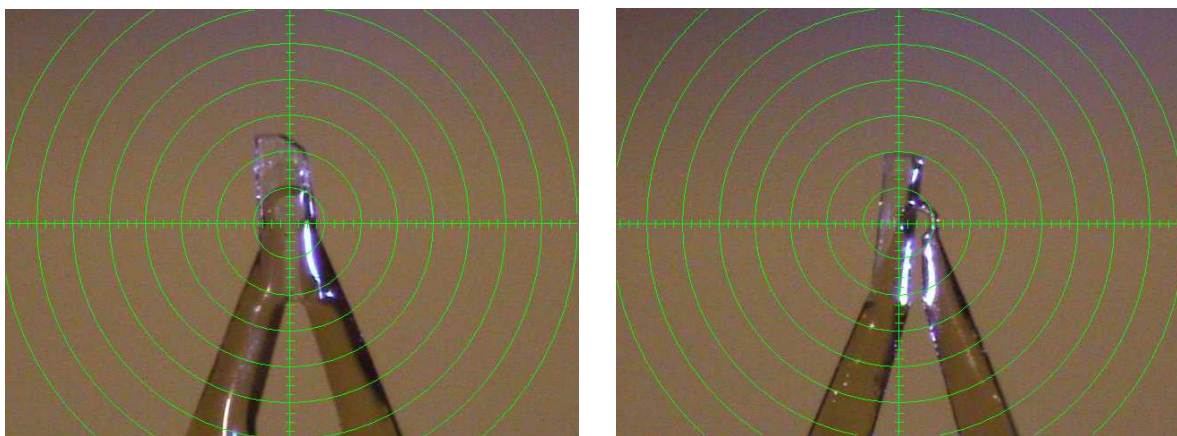

**Figure S1.** The images of single crystals of tri-carbamates **C-4** (left) and **C-6** (right).

## 2.2. $^1\text{H}$ , $^{13}\text{C}$ NMR and IR Spectra

(a)

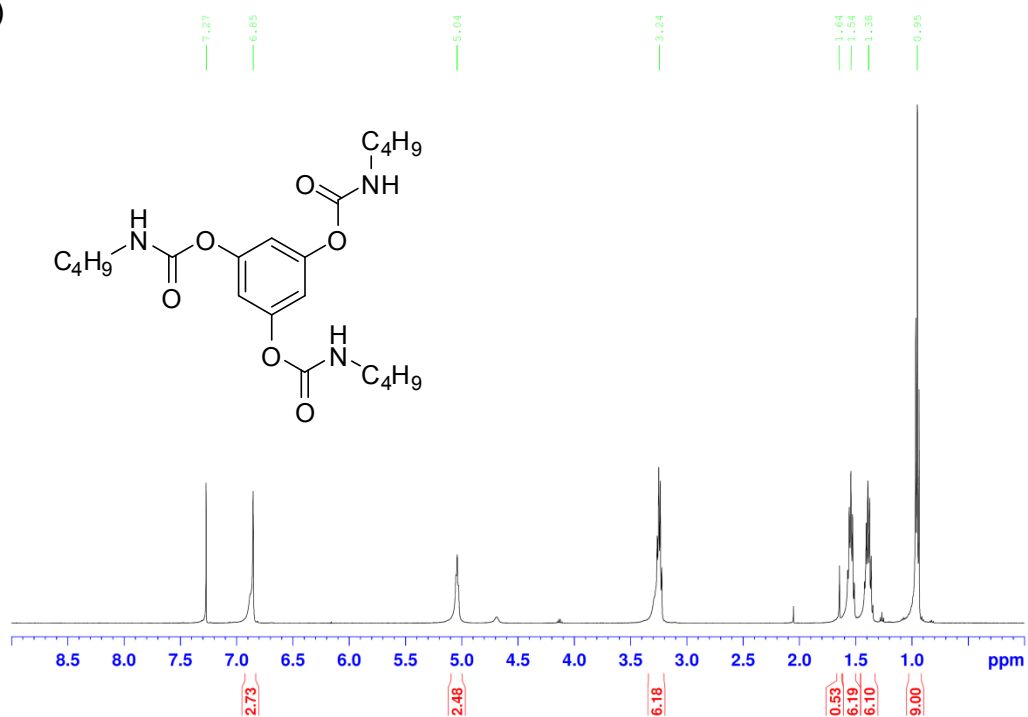

(b)

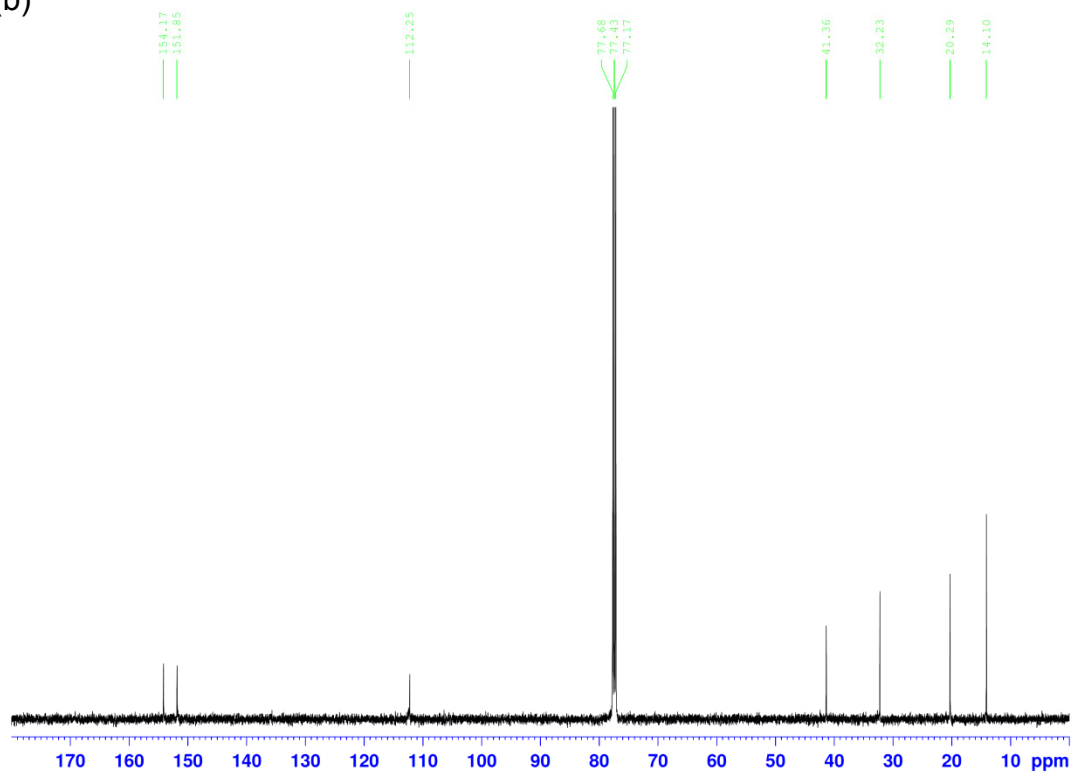

(c)

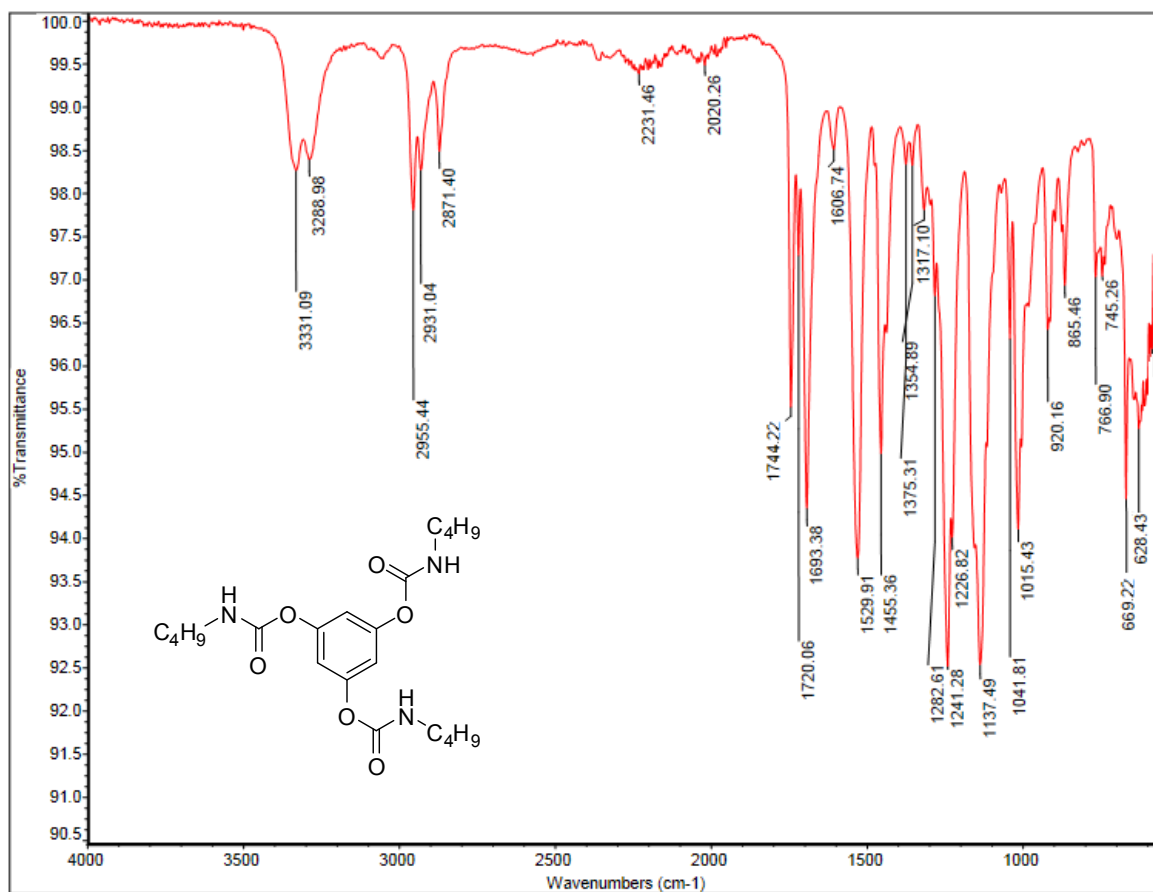

**Figure S2.** <sup>1</sup>H- (a) and <sup>13</sup>C- (b) NMR and IR (c) spectra of **C-4** at room temperature.

(a)

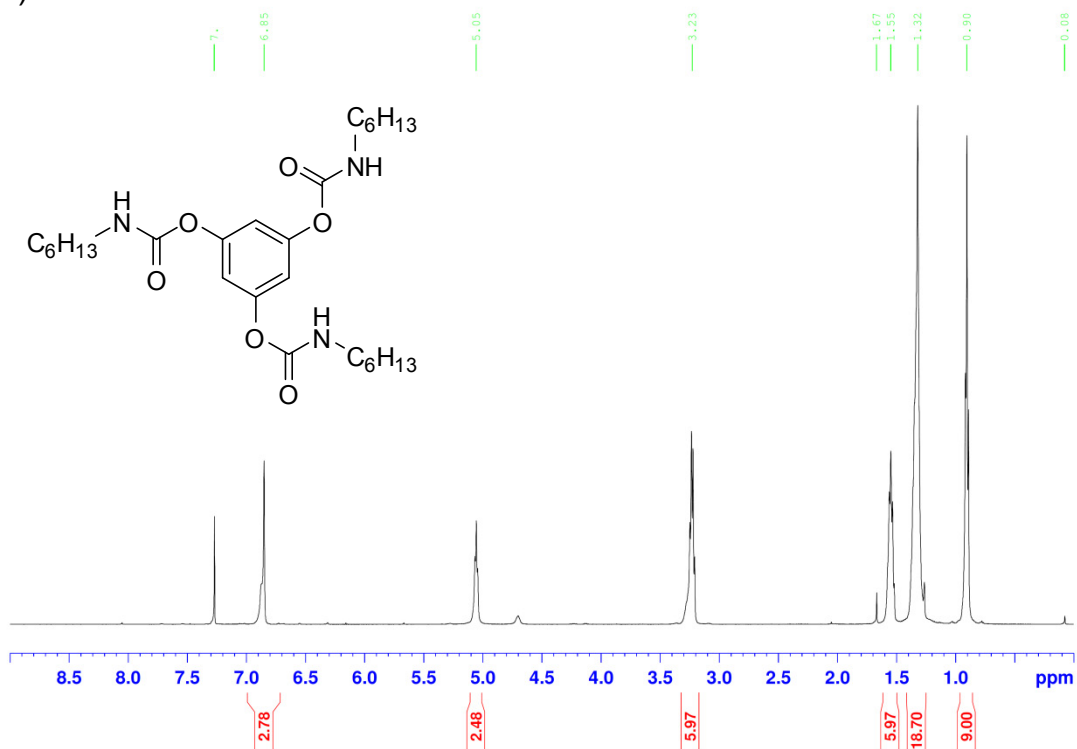

(b)

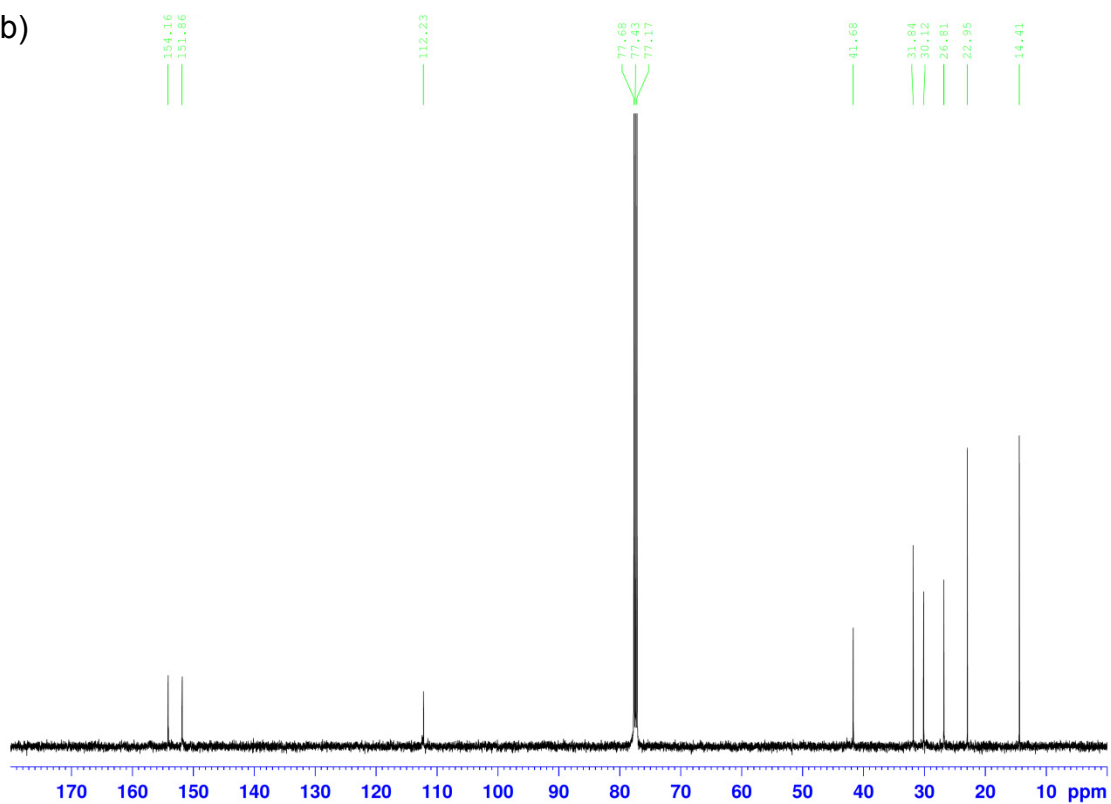



(c)

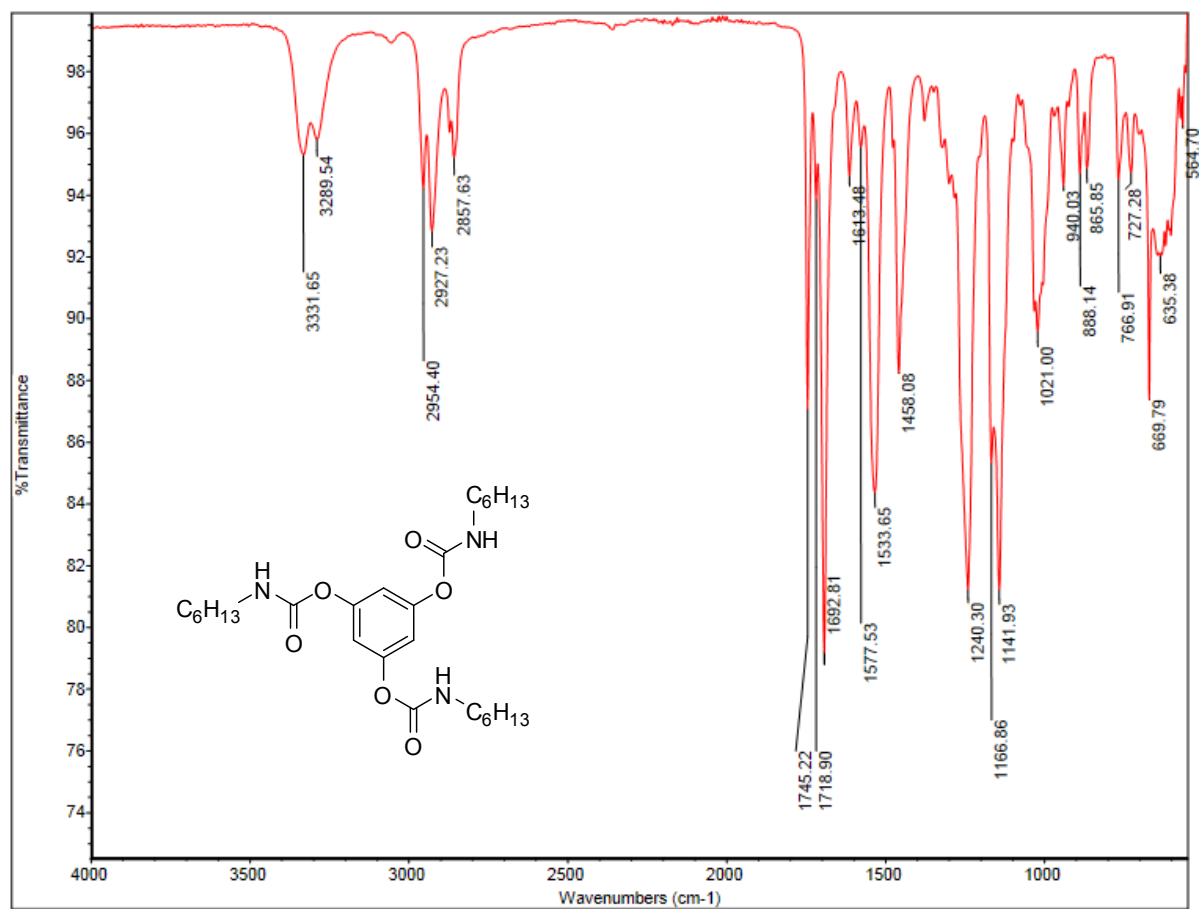

**Figure S3.**  $^1\text{H}$ - (a) and  $^{13}\text{C}$ - (b) NMR and IR(c) spectra of **C-6** at room temperature.

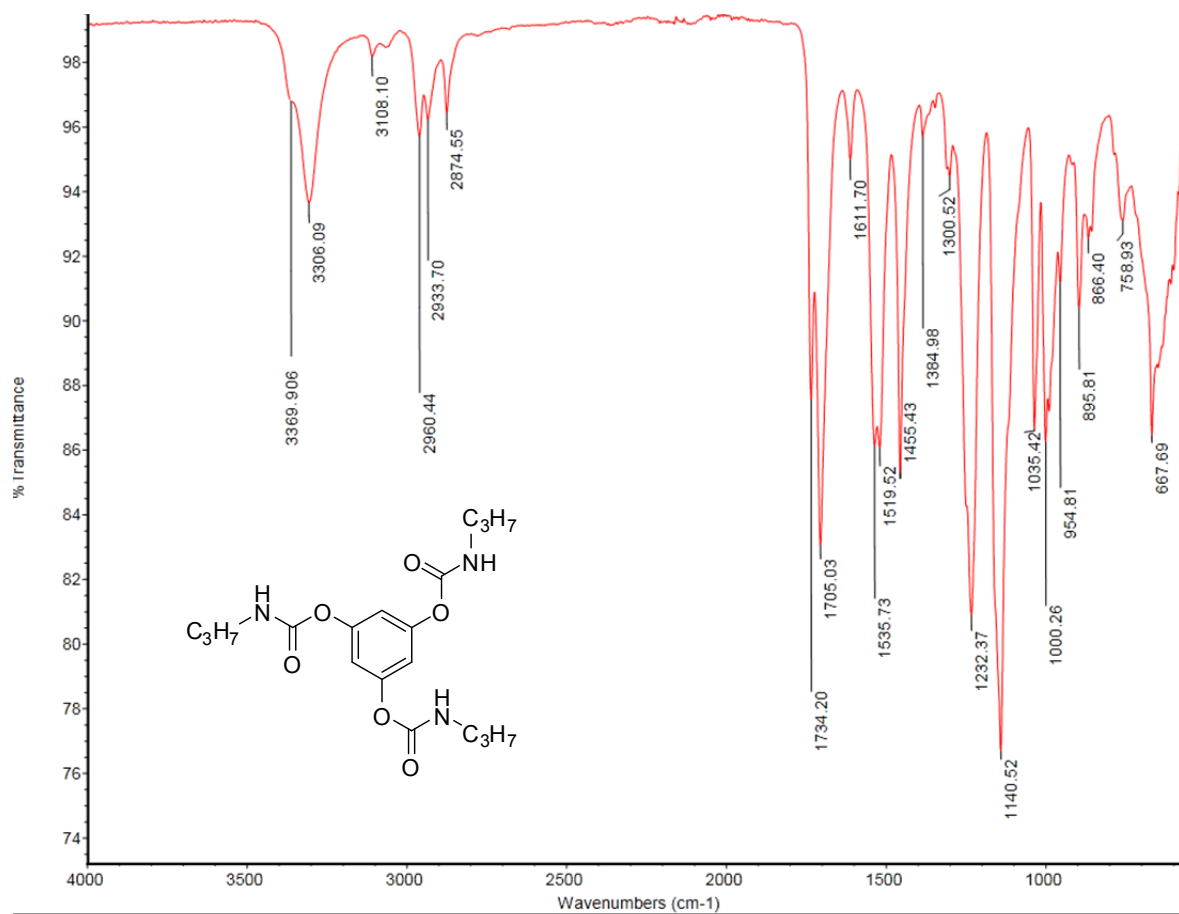

**Figure S4.** IR spectra of **C-3** at room temperature for comparison.

2.3.  $^1\text{H}$ - NMR spectura of **C-6** in  $\text{CDCl}_3$  at different concentration

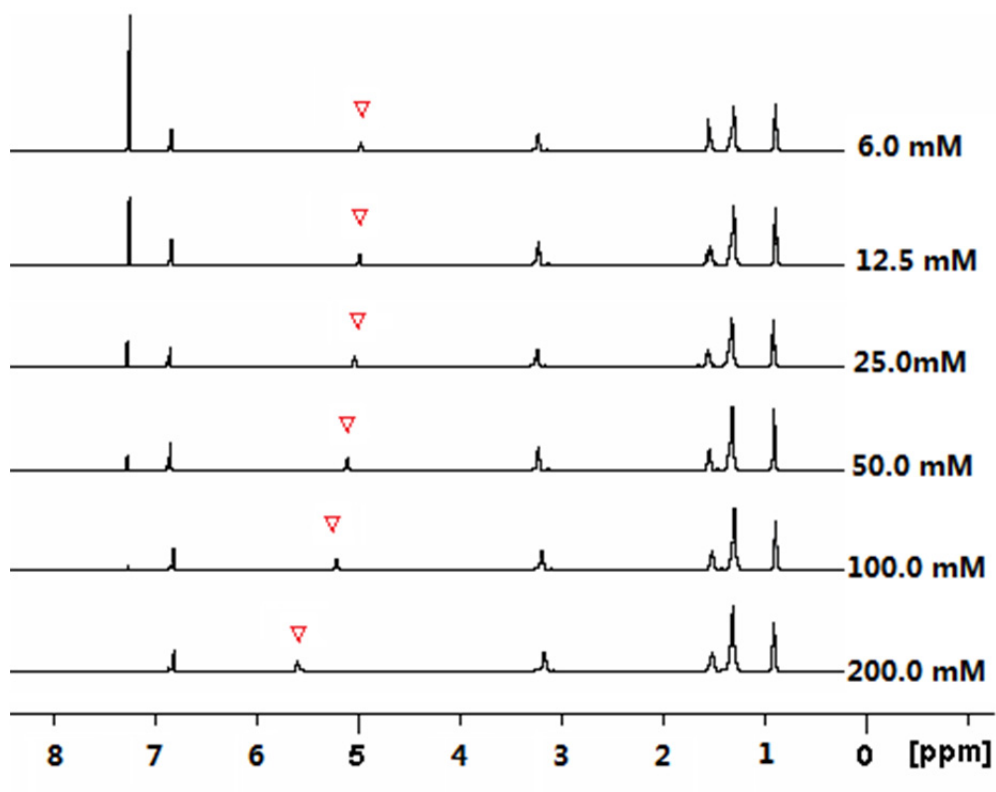

**Figure S5.**  $^1\text{H}$ - NMR spectura of **C-6** in  $\text{CDCl}_3$  at different concentration at room temperature.

## 2.4. ORTEP and Hydrogen Bond Table of C-4 Crystal Structures

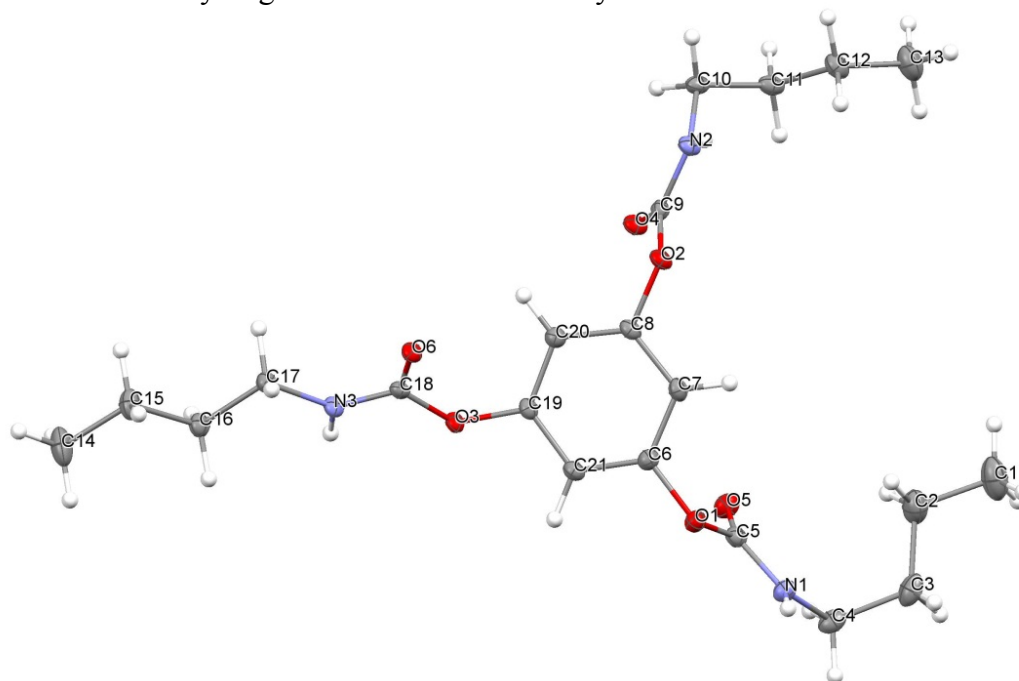

**Figure S6.** Oak Ridge thermal ellipsoid plot (ORTEP) representation of **C-4** at 30% electron density

**Table S1:** Hydrogen bonds of **C-4** with  $H...A < r(A) + 2.000 \text{ \AA}$  and  $\angle DHA > 110^\circ$

| D-H             | d(D-H) | d(H...A) | $\angle DHA$ | d(D...A)   | A                        |
|-----------------|--------|----------|--------------|------------|--------------------------|
| <b>N1-H1</b>    | 0.880  | 2.022    | 175.08       | 2.9002(12) | O6 [ -x, y-1/2, -z+1/2 ] |
| <b>N2-H2</b>    | 0.880  | 2.108    | 152.42       | 2.9170(11) | O6 [ -x, -y+1, -z+1 ]    |
| <b>N3-H3</b>    | 0.880  | 2.086    | 150.88       | 2.8869(12) | O4 [ -x, -y+1, -z ]      |
| <b>C10-H10A</b> | 0.990  | 2.627    | 165.28       | 3.5932(14) | O4 [ x, -y+3/2, z+1/2 ]  |
| <b>C17-H17A</b> | 0.990  | 2.479    | 135.58       | 3.2606(14) | O5 [ -x, -y+1, -z ]      |

## 2.5. ORTEP and Hydrogen Bond Table of C-6 Crystal Structures

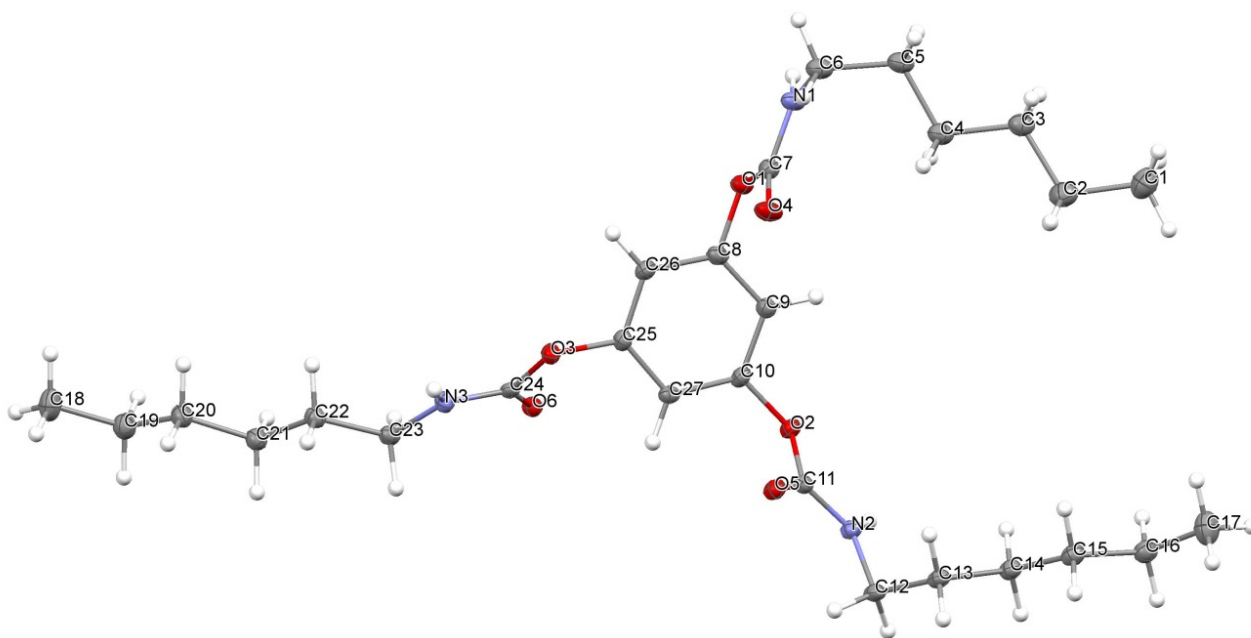

**Figure S7.** Oak Ridge thermal ellipsoid plot (ORTEP) representation of **C-6** at 30% electron density

**Table S2.** Hydrogen bonds of **C-6** with  $H...A < r(A) + 2.000 \text{ \AA}$  and  $\angle DHA > 110^\circ$

| D-H             | d(D-H) | d(H..A) | $\angle DHA$ | d(D..A)   | A                        |
|-----------------|--------|---------|--------------|-----------|--------------------------|
| <b>N1-H1</b>    | 0.880  | 2.023   | 178.83       | 2.9027(1) | O6 [ -x, y+1/2, -z+3/2 ] |
| <b>N2-H2</b>    | 0.880  | 2.122   | 153.47       | 2.9354(2) | O6 [ -x, -y+1, -z+1 ]    |
| <b>N3-H3</b>    | 0.880  | 2.199   | 145.12       | 2.9640(2) | O5 [ -x, -y+1, -z+2 ]    |
| <b>C23-H23A</b> | 0.990  | 2.444   | 138.30       | 3.2509(2) | O4 [ -x, -y+1, -z+2 ]    |

## 2.6. Images of C-6 Crystal Structure

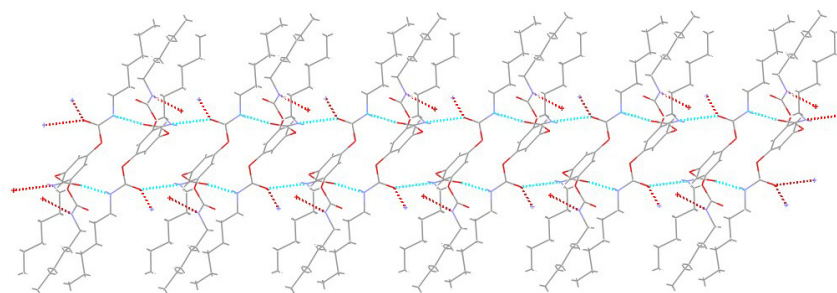

**Figure S8.** A side view of the hydrogen bonded ribbon of C-6

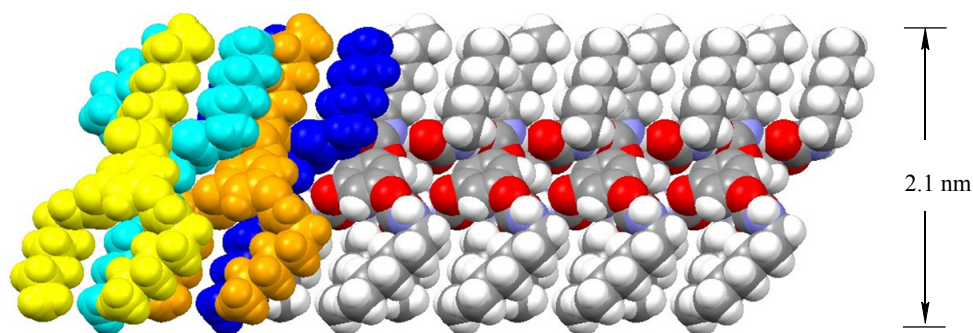

**Figure S9.** Hydrogen bonded ribbon of C-6 in space-filling style

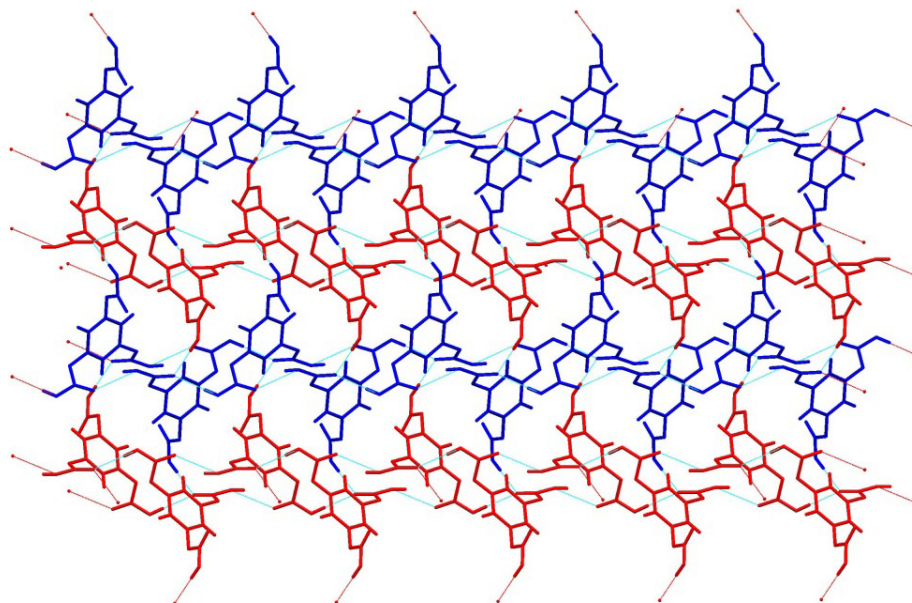

**Figure S10.** Hydrogen bonded sheet backbone of C-6. (hydrogen atoms are omitted and the side chains are replaced with carbon atoms for simplicity. Neighboring hydrogen bonded ribbons are shown in two colors for clarity.)

## 2.7. Packing of C-4 and C-6 sheets in Crystals

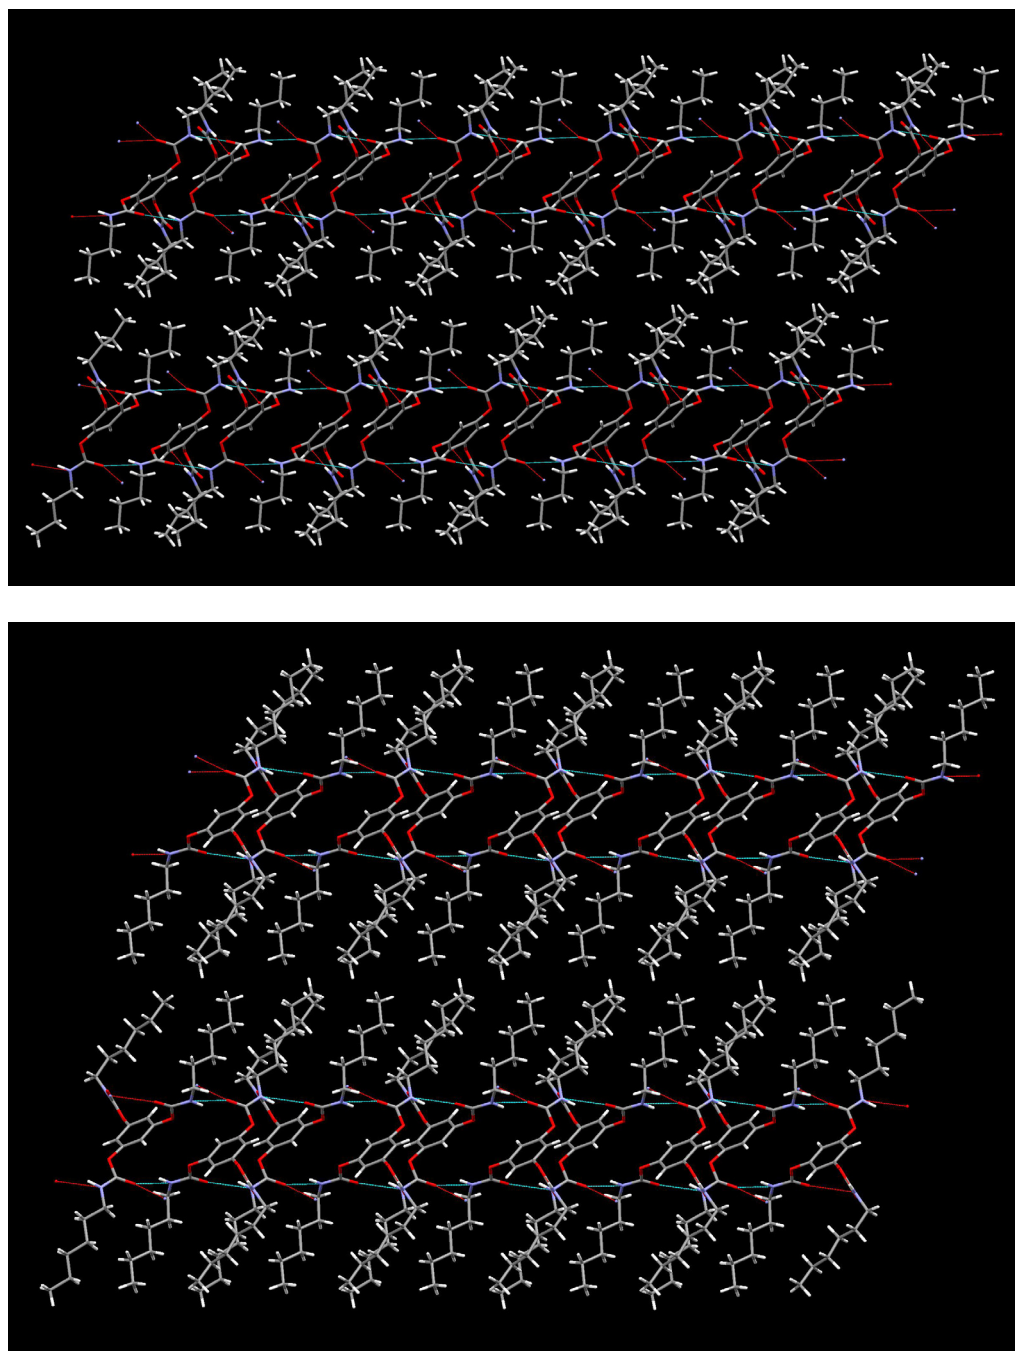

**Figure S11.** Crystal packing showing that there is no groove on the surfaces of the unsaturated sheet:  
a) side view of two layers of C-4; b) side view of two layers of C-6.
